# Supplementary material for: Fast capture of methyl-dyes over hierarchical amino-Co0.3Ni0.7Fe2O4@SiO2 nanofibrous membranes
Source: Royal Society of Chemistry journal article supplement (doi:10.1039/c5ta06310h), 2015-01-01
Supplement: c5ta06310h1.pdf [file c5ta06310h1.pdf]

## **Fast capture of methyl-dyes from wastewater over hierarchical**

### **amino-Co<sub>0.3</sub>Ni<sub>0.7</sub>Fe<sub>2</sub>O<sub>4</sub>@SiO<sub>2</sub> nanofibrous membrane**

Zhigao Zhu<sup>a</sup>, Guihua Li<sup>a</sup>, Gaofeng Zeng<sup>\*a</sup>, Xinqing Chen<sup>a</sup>, Deng Hu<sup>a</sup>, Yanfeng Zhang<sup>\*a, b</sup>, Yuhan Sun<sup>a, b</sup>

<sup>a</sup> CAS key Laboratory of Low-carbon Conversion Science and Engineering, Shanghai Advanced Research Institute, Chinese Academy of Sciences, Shanghai 201210, China. E-mail: [zenggf@sari.ac.cn](mailto:zenggf@sari.ac.cn); [zhangyf@sari.ac.cn](mailto:zhangyf@sari.ac.cn); Fax/Tel: +86 21 20350958

<sup>b</sup> School of Physical Science and Technology, ShanghaiTech University, Shanghai 201210, China

## Materials:

Poly(vinyl alcohol) (PVA; *MW* ranging from 85000 to 124000 g/mol) was purchased from Sigma, tetraethyl orthosilicate (TEOS, 98 wt%) was purchased from Lingfeng Chemical Co., Ltd., China. Phosphoric acid ( $\text{H}_3\text{PO}_4$ , 85 wt%),  $\text{Co}(\text{NO}_3)_2 \cdot 6 \text{H}_2\text{O}$ ,  $\text{Ni}(\text{NO}_3)_2 \cdot 6 \text{H}_2\text{O}$ ,  $\text{Fe}(\text{NO}_3)_3 \cdot 9 \text{H}_2\text{O}$  were purchased from Aladdin Chemical Reagent Co., Ltd., China. Dopamine and Tris-HCl were purchased from Shanghai Richjont Chemical Reagents Co., Ltd. China. Paper adhesive was purchased from Shanghai petrochemical adhesive factory Co., Ltd., China. DI water was obtained from a Millipore system. All chemicals were of analytical grade and were used as received without further purification.

## Preparation of $\text{SiO}_2$ NFMs

The electrospun  $\text{SiO}_2$  NFMs were fabricated as follows. The precursor solution was prepared by dissolving PVA in DI water at 70 °C with vigorous stirring for 12 h. A silica sol with a molar ratio of  $\text{SiO}_2:\text{H}_2\text{O}:\text{H}_3\text{PO}_4=1:11:0.01$  was prepared through hydrolysis TEOS in phosphoric acid solution. Then, 10 g of resultant silica sol was mixed with 10 g of PVA solution to improve the electrospinnability of the PVA/ $\text{SiO}_2$  solution. The electrospinning process was performed at a fixed voltage of 20 kV and a fixed feed rate of 1.0 mL h<sup>-1</sup> with a distance of 20 cm between the needle tip and the round collector. The chamber temperature and relative humidity during electrospinning were 23±2 °C and 42±3%. Finally, the electrospun  $\text{SiO}_2$  nanofiber membrane (NFM) was collected on an aluminum foil then calcined at 800 °C in air to remove the PVA. Thus, a pure  $\text{SiO}_2$  NFMs was obtained for future experiments.

## Fabrication of $\text{Co}_{0.3}\text{Ni}_{0.7}\text{Fe}_2\text{O}_4@ \text{SiO}_2$ NFMs

Mixed salts solution was prepared by dissolving  $\text{Fe}(\text{NO}_3)_3 \cdot 9 \text{H}_2\text{O}$ ,  $\text{Co}(\text{NO}_3)_2 \cdot 6 \text{H}_2\text{O}$  and  $\text{Ni}(\text{NO}_3)_2 \cdot 6 \text{H}_2\text{O}$  in DI water with an atomic ratio of 0.3Co: 0.7Ni:2Fe of 1, 2 and 4 wt% of  $\text{Fe}(\text{NO}_3)_3 \cdot 9 \text{H}_2\text{O}$ , were dissolved in distilled water, and guarantee the  $\text{Co}(\text{NO}_3)_2 \cdot 6 \text{H}_2\text{O}$  and  $\text{Ni}(\text{NO}_3)_2 \cdot 6 \text{H}_2\text{O}$ , a mole ratio corresponding to the nominal

composition of Co: Ni: Fe ratio of 0.3: 0.7: 2, and Then paper adhesive solution (with various concentrations: 0.5, 1 and 2 wt%) was mixed with the above salt solution and vigorously stirred until a homogeneous gelatin sol was obtained. Subsequently, the SiO<sub>2</sub> NFMs was dipped in the mixed sol for 10 min with mild stirring. After dipcoating, the membranes were dried in a oven at 50 °C for 30 min, leading to the formation of the crosslinked gelatin layer on fiber surface which contained homogeneously distributed Co(NO<sub>3</sub>)<sub>2</sub>, Ni(NO<sub>3</sub>)<sub>2</sub> and Fe(NO<sub>3</sub>)<sub>3</sub>. Then, the gelatin/SiO<sub>2</sub> NFMs were calcined at 700 °C for 2 h with a heating rate of 5 °C/min in N<sub>2</sub> flow and yielded the Co<sub>0.3</sub>Ni<sub>0.7</sub>Fe<sub>2</sub>O<sub>4</sub>@SiO<sub>2</sub> NFMs. Different concentration of paper adhesive and salt concentration was denoted as A-x-SiO<sub>2</sub> NFMs-M-y in the subsequent supporting information discussion, where A and M stands for adhesive and metal ion, and x and y stands for the concentration of adhesive and Fe(NO<sub>3</sub>)<sub>3</sub>·9 H<sub>2</sub>O.

### **Surface modification of Co<sub>0.3</sub>Ni<sub>0.7</sub>Fe<sub>2</sub>O<sub>4</sub>@SiO<sub>2</sub> NFMs by dopamine**

Co<sub>0.3</sub>Ni<sub>0.7</sub>Fe<sub>2</sub>O<sub>4</sub>@SiO<sub>2</sub> NFMs were surface modified with aqueous solutions of dopamine and HCl (2 mg/ml dopamine in 10 mM Tris-buffer, pH=8.5). The pH of the solution was monitored with a pH meter (Mettler Toledo FE-20). The Co<sub>0.3</sub>Ni<sub>0.7</sub>Fe<sub>2</sub>O<sub>4</sub>@SiO<sub>2</sub> NFMs was stirred in the dopamine solution at 50 °C for 24 h, and the color of the solution changed from brown to dark brown. The Co<sub>0.3</sub>Ni<sub>0.7</sub>Fe<sub>2</sub>O<sub>4</sub>@SiO<sub>2</sub> NFMs coated with PDA were suction filtered, rinsed thoroughly with deionized water at least three times, and dried in a vacuum oven at 50 °C for 6 h. The PDA coated Co<sub>0.3</sub>Ni<sub>0.7</sub>Fe<sub>2</sub>O<sub>4</sub>@SiO<sub>2</sub> NFMs was denoted as PDA-Co<sub>0.3</sub>Ni<sub>0.7</sub>Fe<sub>2</sub>O<sub>4</sub>@SiO<sub>2</sub> NFMs.

### **Characterization**

The morphology of NFMs was examined by a scanning electron microscope (SEM, Hitachi, S4800). TEM and selected area electron diffraction patterns were acquired by a JEM-2100F, JEOL Ltd., Japan. X-ray diffraction (XRD) patterns of NFMs were

obtained on an X-ray diffractometer (Rigaku, ultima IV). Thermal degradation measurements were performed using a thermogravimetric analyzer (TG) (NETZSCH, STA 449F3). Fourier-transform infrared spectroscopy (FT-IR, Thermo Scientific, Nicolet 6700) was applied to detect the presence of dopamine. BET surface area and pore size distribution were obtained by measuring N<sub>2</sub> adsorption-desorption isotherms on a Micromeritics, physisorption analyzer, ASAP 2020. The concentration of dye in the solution was measured by a UV–Vis spectrometer (Shimadzu, UV-1800). The near-surface chemical information of materials were analyzed by X-ray photoelectron spectroscopy (XPS, K-Alpha, Al K $\alpha$  radiation, 1486.6 eV, 12 kV, 3 mA). XPS peak positions were calibrated with the help of the C 1s peak at 285.0 eV. The N content of hybrid membrane before and after adsorption was analyzed by an organic elemental analyzer (Thermo Flash 2000).

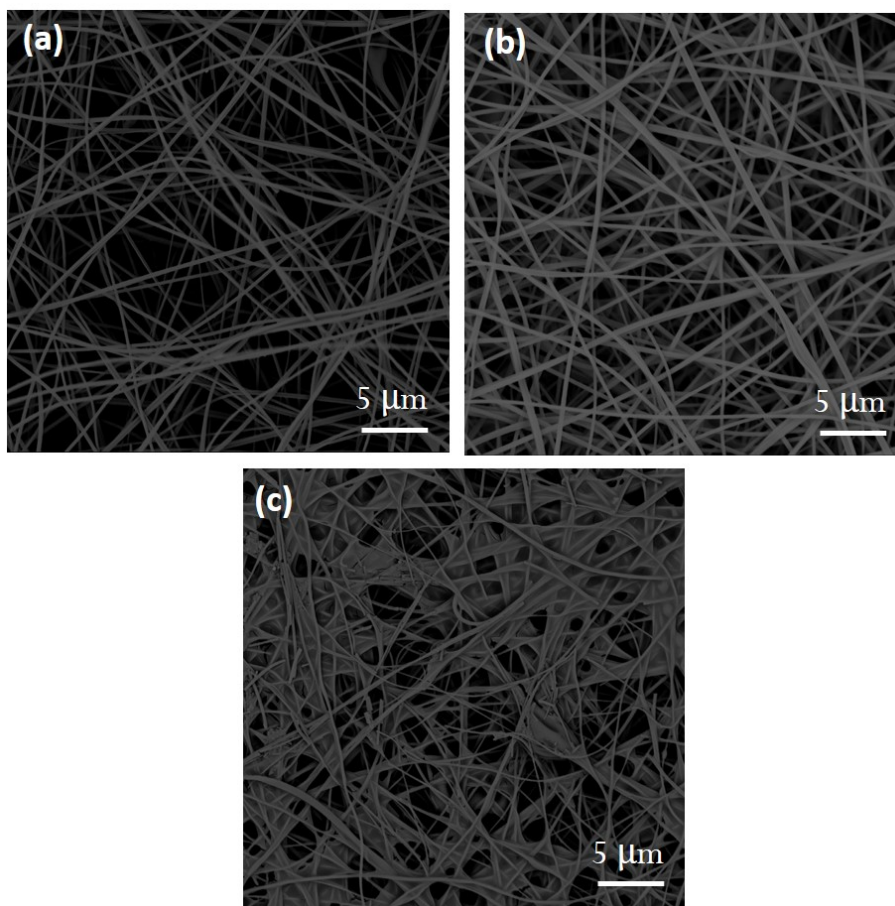

Fig. S1. FE-SEM images of SiO<sub>2</sub> NFMs dip-coated in aqueous paper adhesive solutions with various concentrations (a) 0.5wt%, (b) 1.0wt% and (c) 2 wt%, respectively.

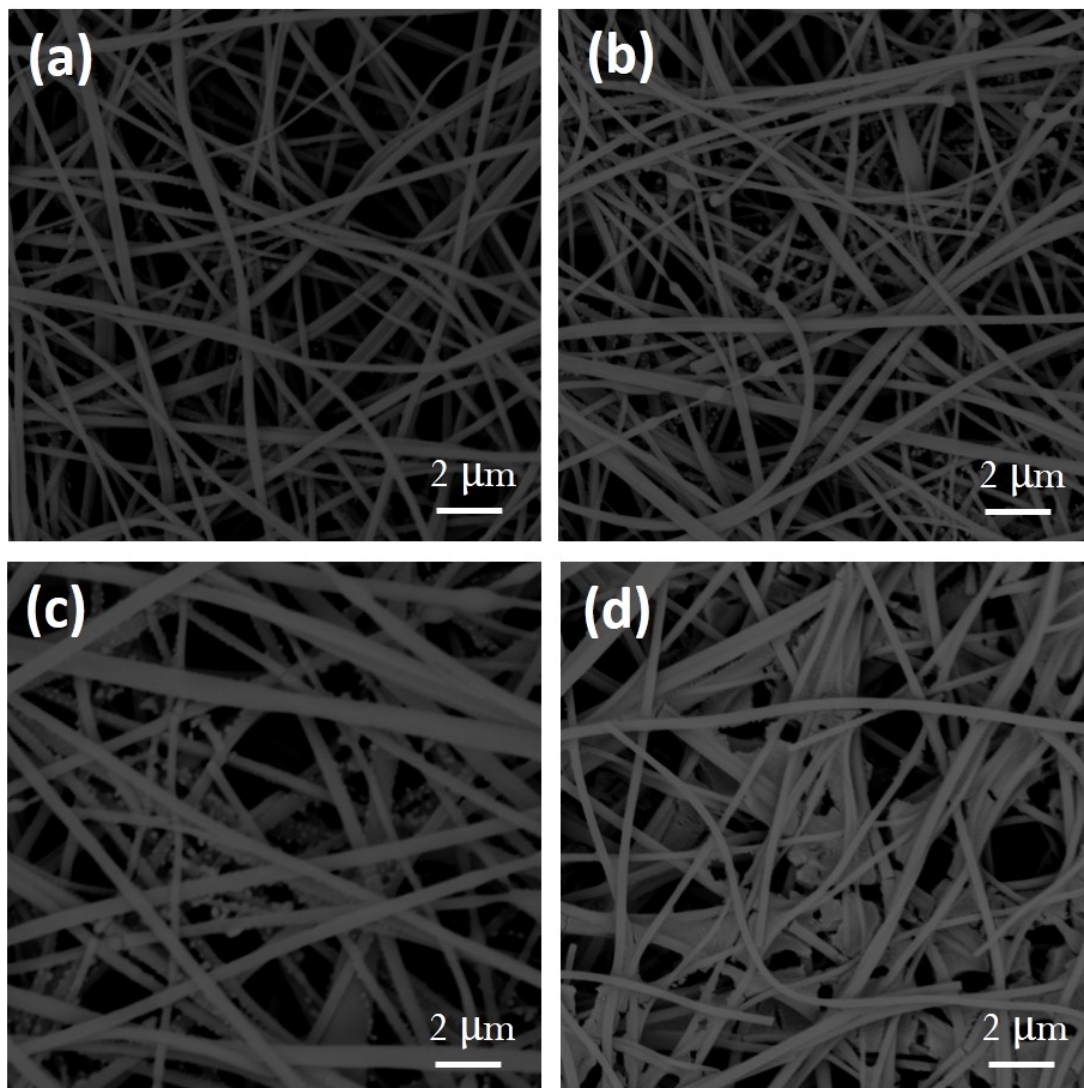

Fig. S2. FE-SEM images of A-1-SiO<sub>2</sub> NFMs dipcoated in solutions with various concentrations of salts (a) 1wt%, (b) 2wt%, (c) 4 wt% and (d) 8 wt%, respectively.

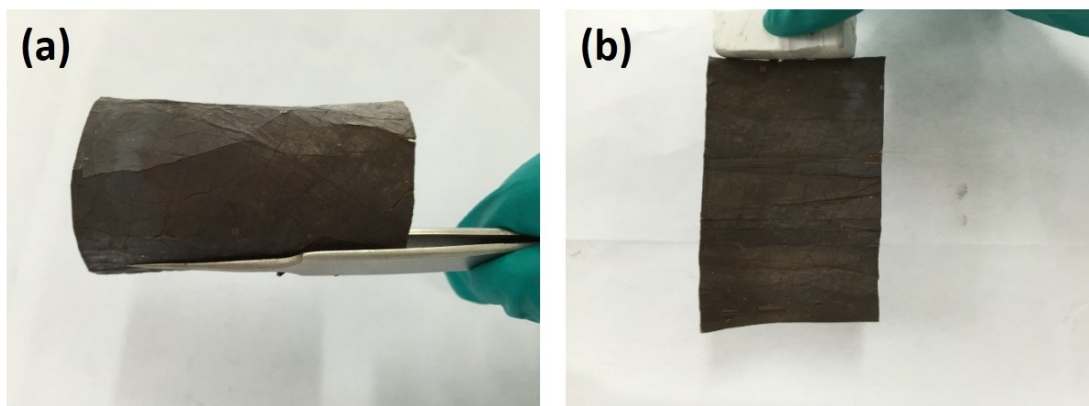

Fig. S3 Demonstrations of the (a) flexibility and (b) magnetism of the NFMs.

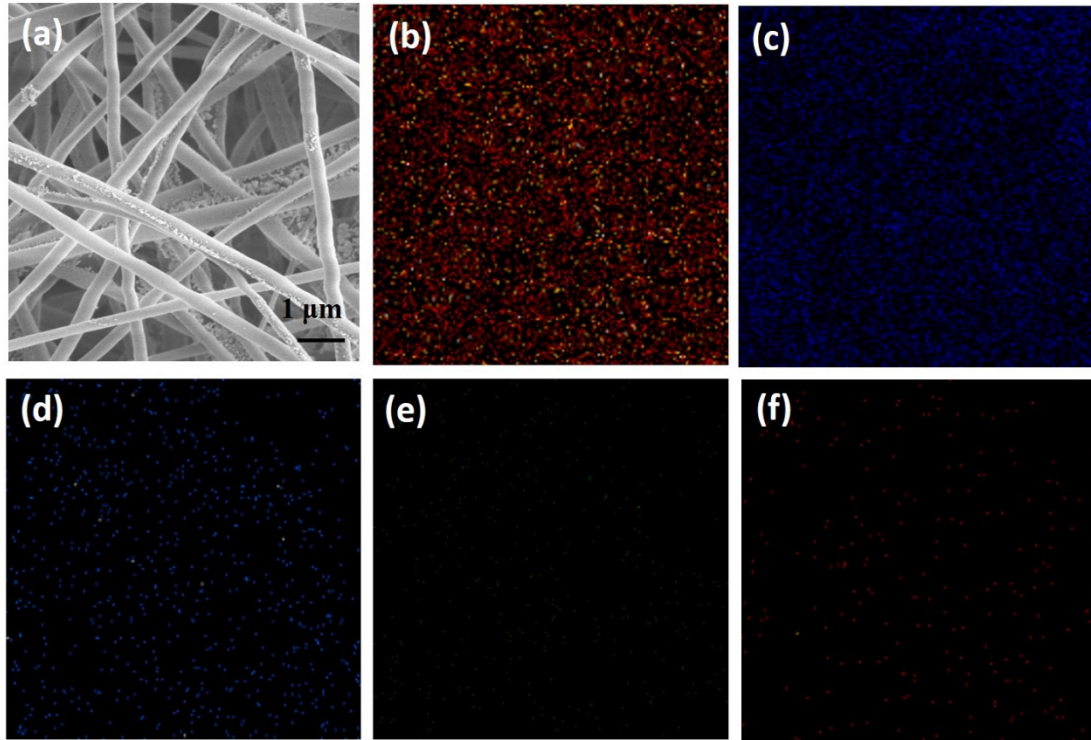

Fig. S4. (a) FE-SEM images of  $\text{Co}_{0.3}\text{Ni}_{0.7}\text{Fe}_2\text{O}_4@\text{SiO}_2$  NFMs and corresponding elemental mapping, (b) oxygen, (c) silicon, (d) iron, (e) cobalt and (f) nickel.



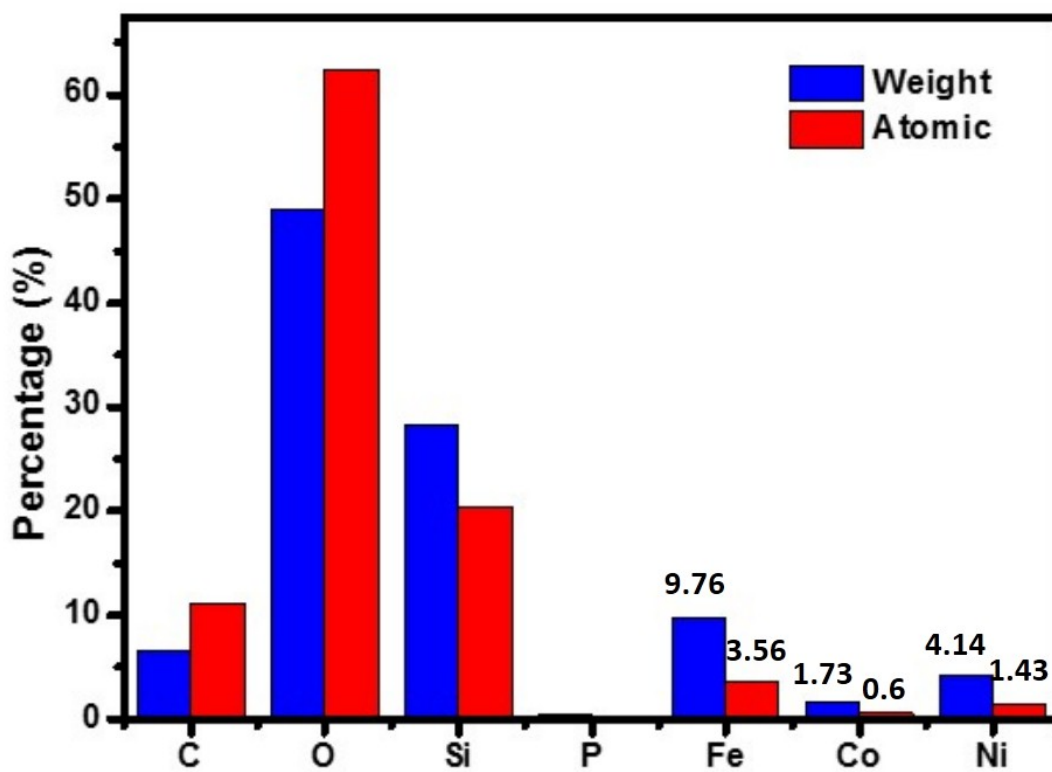

Fig. S5. EDS results of the weight and atomic percentage of C, O, Si, P, Fe, Co and Ni of  $\text{Co}_{0.3}\text{Ni}_{0.7}\text{Fe}_2\text{O}_4@\text{SiO}_2$  NFMs.

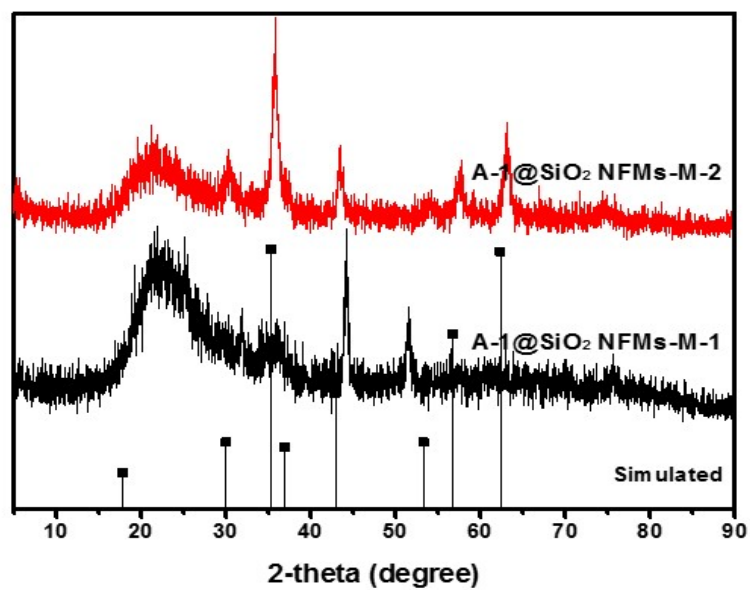

Fig. S6. XRD diffraction patterns of  $\text{Co}_{0.3}\text{Ni}_{0.7}\text{Fe}_2\text{O}_4@SiO_2$  NFMs prepared with various salt concentrations.

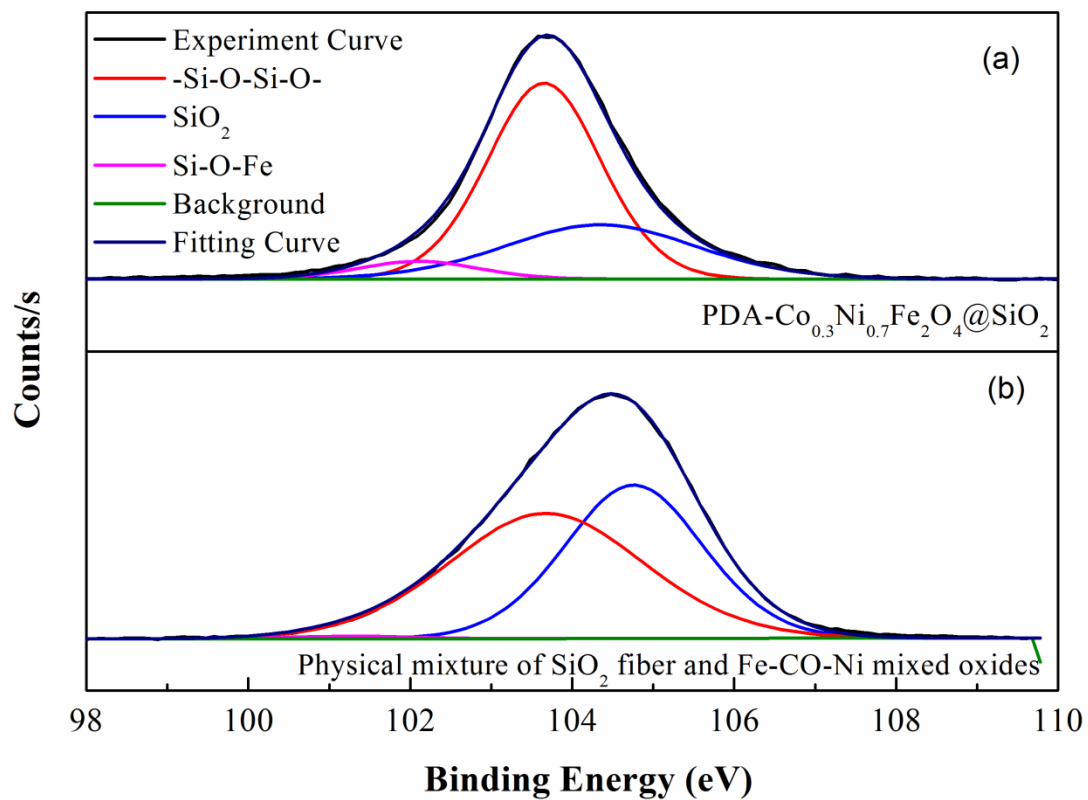

Fig. S7 Si<sub>2p</sub> spectra of PDA-Co<sub>0.3</sub>Ni<sub>0.7</sub>Fe<sub>2</sub>O<sub>4</sub>@SiO<sub>2</sub> NFM (a) and physical mixed SiO<sub>2</sub>/Fe-Co-Ni oxides (b).

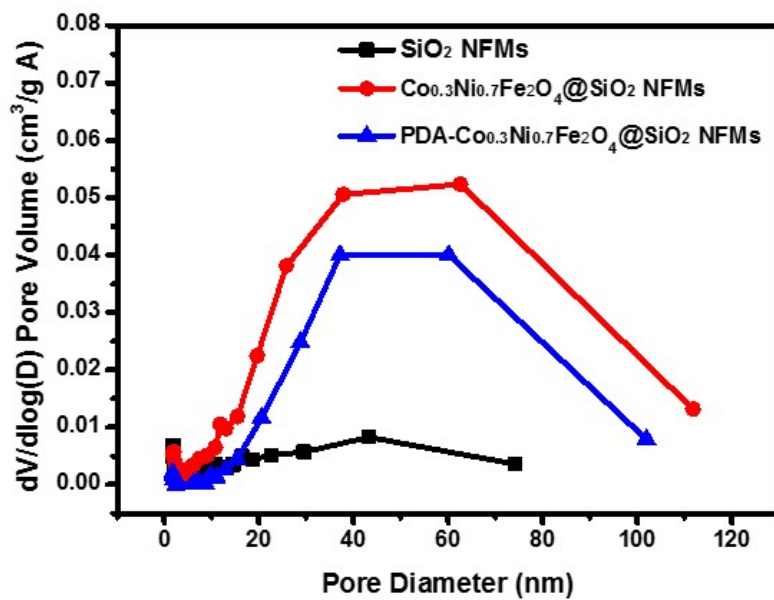

Fig. S8. Pore size distributions (calculated from N<sub>2</sub> adsorption-desorption isotherms) of SiO<sub>2</sub>, Co<sub>0.3</sub>Ni<sub>0.7</sub>Fe<sub>2</sub>O<sub>4</sub>@SiO<sub>2</sub> and PDA-Co<sub>0.3</sub>Ni<sub>0.7</sub>Fe<sub>2</sub>O<sub>4</sub>@SiO<sub>2</sub> NFMs.

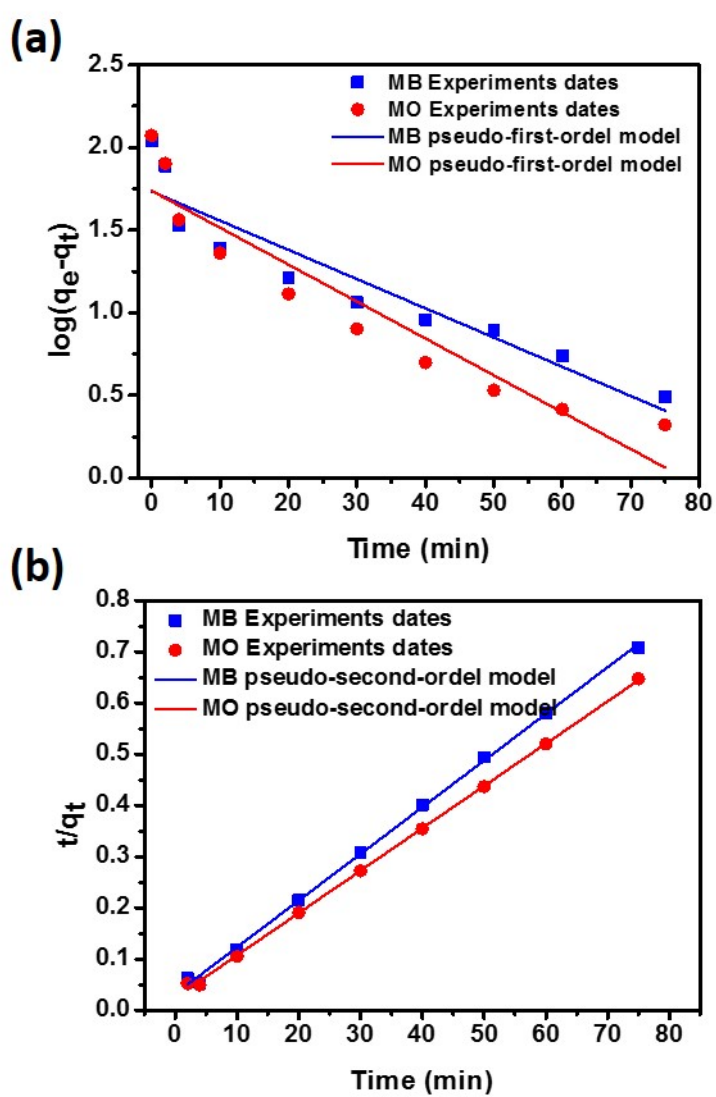

Fig. S9. Adsorption kinetics for MO and MB onto PDA-Co<sub>0.3</sub>Ni<sub>0.7</sub>Fe<sub>2</sub>O<sub>4</sub>@SiO<sub>2</sub> NFMs. (a) pseudo-first-order and (b) pseudo-second-order.

Table S1 Comparison of the adsorption capacity of NFMs .

| Adsorbents                                                                         | Dye | Concentration (g/L) | pH  | Adsorption capacity (mg/g) | Response time (h) | Ref          |
|------------------------------------------------------------------------------------|-----|---------------------|-----|----------------------------|-------------------|--------------|
| Acid/carbon                                                                        | MO  | 0.5-0.6             | 6   | 88                         | 48                | [1]          |
| $\gamma$ -Fe <sub>2</sub> O <sub>3</sub><br>/MWCNTs/c<br>hitosan                   | MO  | 0.05                | 6.5 | 61.43                      | 3                 | [2]          |
| hollow $\alpha$ -Fe <sub>2</sub> O <sub>3</sub><br>nanofibers                      | MO  | 0.1                 | 7   | 80.6                       | 0.25              | [3]          |
| Keratin<br>nanofibrous                                                             | MB  | 0.25                | 6   | 170                        | 0.83              | [4]          |
| Fe <sub>3</sub> O <sub>4</sub> /graphene<br>nanocomposite                          | MB  | 0.25                | -   | 70                         | 3                 | [5]          |
| PVA/PAA@PDA                                                                        | MB  | 0.05                | 3-4 | 445.7                      | 1.25              | [6]          |
| PDA-<br>Co <sub>0.3</sub> Ni <sub>0.7</sub> Fe <sub>2</sub> O <sub>4</sub><br>NFMs | MO  | 0.02                | 7   | 116.2                      | 0.66              | This<br>work |
| PDA-<br>Co <sub>0.3</sub> Ni <sub>0.7</sub> Fe <sub>2</sub> O <sub>4</sub><br>NFMs | MB  | 0.02                | 7   | 107.5                      | 1                 | This<br>work |

## Reference

- [1] W. Cheah, S. Hosseini, M. A. Khan, T. G. Chuah & T. S. Choong, *Chem Eng J*, 2013, **215**, 747.
- [2] H. Zhu, R. Jiang, L. Xiao & G. Zeng, (2010). *Bioresource technol*, 2010,**101**, 5063.
- [3] Q. Gao, J. Luo, X. Wang, C. Gao & M. Ge, *Nanoscale res lett*, 2015, **10**, 1.
- [4] A. Aluigi, F. Rombaldoni, C. Tonetti & L. Jannoke, *J Hazard Mater*, 2014, **268**, 156.
- [5] Y. P. Chang, C. L. Ren, J. Qu & X. Chen, *Appl Surf Sci*, 2012, **261**, 504.
- [6] J. Yan, Y. Huang, Y. Miao, W. Tjiu & T. Liu, *J Hazard Mater*, 2015, **283**, 730.
